# Supplementary material for: Investigation into the reactivity of the coordinatively unsaturated phosphonodithioato [Ni(MeOpdt)2] towards 2,4,6-tris(2-pyridyl)-1,3,5-triazine: goals and achievements
Source: Royal Society of Chemistry journal article supplement (doi:10.1039/b701458a), 2007-01-01
Supplement: b701458a.pdf [file b701458a.pdf]

**Fig. S1** Plot of molar conductivity  $\Lambda_M$  ( $\text{S}\cdot\text{cm}^2\cdot\text{mol}^{-1}$ ) recorded during the titration of **1** ( $9.98\cdot 10^{-2}$  M) with tptz ( $1.00\cdot 10^{-1}$  M) vs. [tptz]/[**1**] molar ratio.

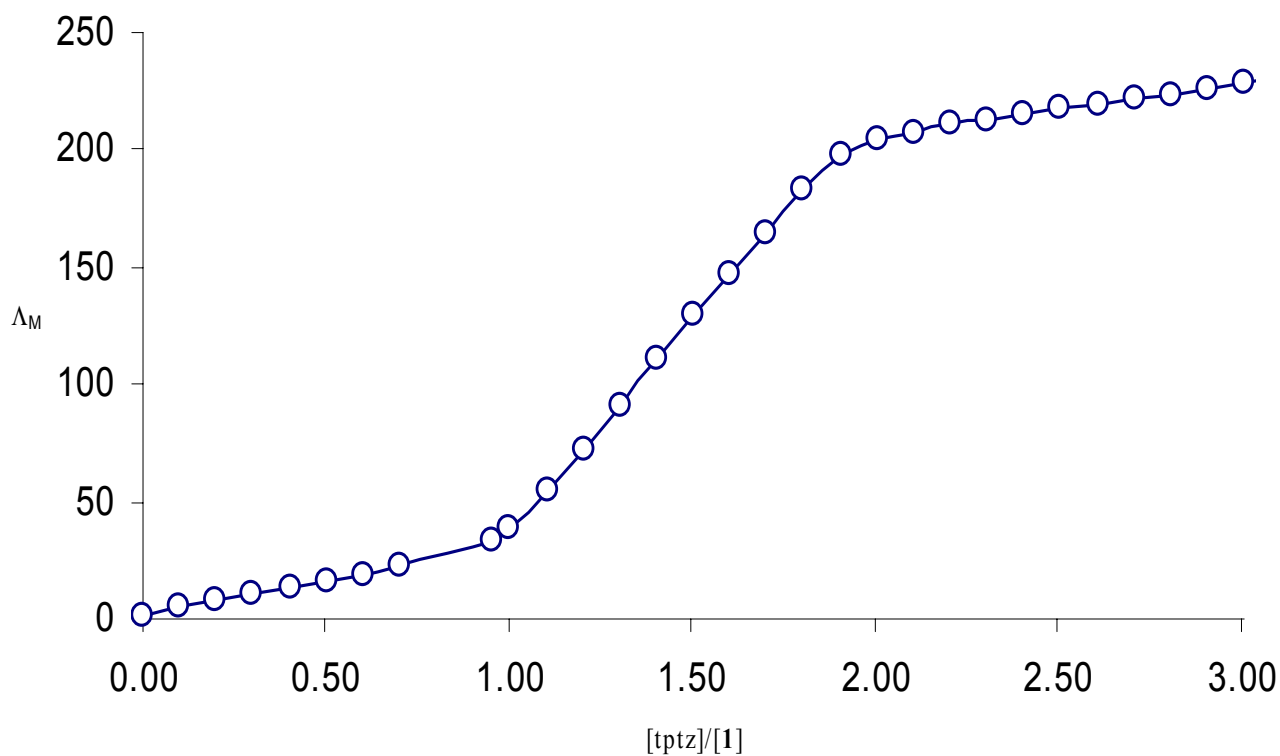

**Fig. S2** Molecular view of **1**. For clarity, only non-carbon atoms have been labelled and hydrogen atoms are omitted. Displacement ellipsoids are drawn at 50% probability.  $\prime$ : 1-x, 1-y, 1-z.

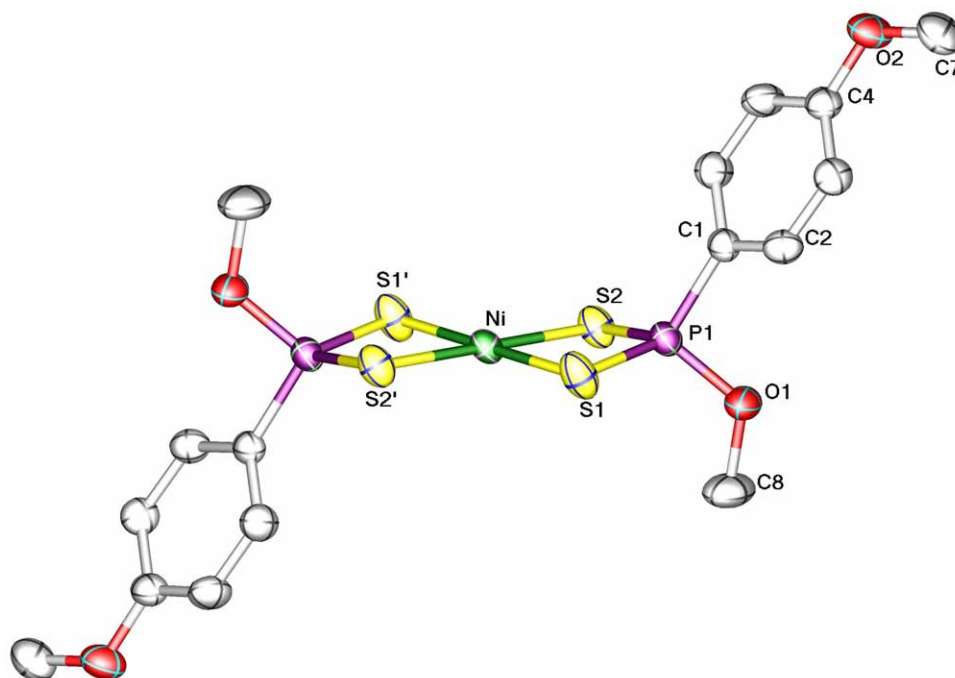

**Table S1** Selected hydrogen bond distances (Å) and angles (°) for compounds **3**·4H<sub>2</sub>O, **6** and **7**.

| <b>Compound 3·4H<sub>2</sub>O</b> |         |         |          |        |                     |
|-----------------------------------|---------|---------|----------|--------|---------------------|
| O6–H6D···O5                       | 0.84(1) | 1.91(1) | 2.746(3) | 172(3) | 1-x, -y, -z         |
| C8–H8···O1                        | 0.95    | 2.34    | 3.206(3) | 152    | x, 0.5-y, 0.5+z     |
| C29–H29···O5                      | 0.95    | 2.40    | 3.147(3) | 135    | 1-x, -0.5+y, 0.5-z  |
| C31–H31···O8                      | 0.95    | 2.41    | 3.056(4) | 125    |                     |
| C10–H10···O8                      | 0.85    | 2.49    | 3.159    | 137    | 1-x, -y, -z         |
| O5–H5C···N12                      | 0.84(1) | 1.98(1) | 2.799(3) | 165(3) | x, 0.5-y, -0.5+z    |
| O6–H6C···N6                       | 0.84(1) | 2.06(1) | 2.875(3) | 164(3) |                     |
| C44–H44A···N2                     | 0.98    | 2.49    | 3.359(4) | 147    |                     |
| O7–H7C···S3                       | 0.97(1) | 2.30(1) | 3.249(3) | 166(3) |                     |
| O8–H8D···S4                       | 0.96(1) | 2.54(2) | 3.441(3) | 157(3) |                     |
| C34–H34···S1                      | 0.95    | 2.78    | 3.707(3) | 166    | 2-x, -0.5+y, 0.5-z  |
| C30–H30···S4                      | 0.95    | 2.78    | 3.532(3) | 137    |                     |
| C13–H13···S3                      | 0.95    | 2.86    | 3.716(3) | 150    | 1-x, -0.5+y, 0.5-z  |
| C36–H36···S4                      | 0.95    | 2.82    | 3.568(3) | 137    | 1-x, -y, 1-z        |
| C38–H38···S2                      | 0.95    | 2.83    | 3.342(3) | 115    |                     |
| <b>Compound 5</b>                 |         |         |          |        |                     |
| C15–H15···N3                      | 0.95    | 2.41    | 2.748(9) | 101    |                     |
| C33–H33···N9                      | 0.95    | 2.41    | 2.752(8) | 101    |                     |
| C8–H8···I1                        | 0.95    | 3.00    | 3.891(6) | 157    | 1+x, y, z           |
| C17–H17···I3                      | 0.95    | 3.04    | 3.993(8) | 177    | -x, 1-y, -z         |
| C29–H29···I6                      | 0.95    | 2.97    | 3.623(7) | 127    | 1+x, y, z           |
| C31–H31···I4                      | 0.95    | 3.01    | 3.729(5) | 133    |                     |
| C31–H31···I5                      | 0.95    | 3.06    | 3.970(6) | 161    |                     |
| <b>Compound 6</b>                 |         |         |          |        |                     |
| C16–H16···Br1                     | 0.95    | 2.89    | 3.739(5) | 150    | 1-x, 1-y, -z        |
| C17–H17···Br2                     | 0.95    | 2.97    | 3.660    | 130    | 0.5+x, 0.5+y, z     |
| C7–H7···Br1                       | 0.95    | 3.04    | 3.759    | 135    | 0.5-x, 0.5+y, 0.5-z |
| C12–H12···Br1                     | 0.95    | 3.05    | 3.893    | 149    | 0.5-x, 0.5-y, -z    |
